# Supplementary material for: Effect of hydrotreating on the pyrolysis oil composition: GC-MS studies
Source: Royal Society of Chemistry journal article supplement (doi:10.1039/d5ay01913c), 2026-01-01
Supplement: d5ay01913c1.pdf [file d5ay01913c1.pdf]

Supplementary material

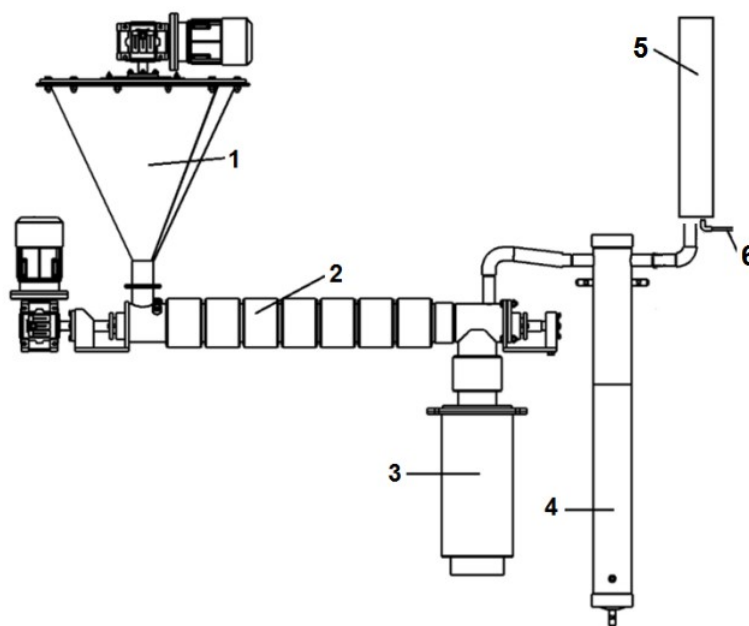

Figure S 1. – Scheme of the pyrolysis unit, where 1 is a dispenser; 2 is a reactor with heating elements; 3 is a solid carbon discharge tank; 4 is a condenser; 5 is an exhaust pipe; 6 is an afterburner

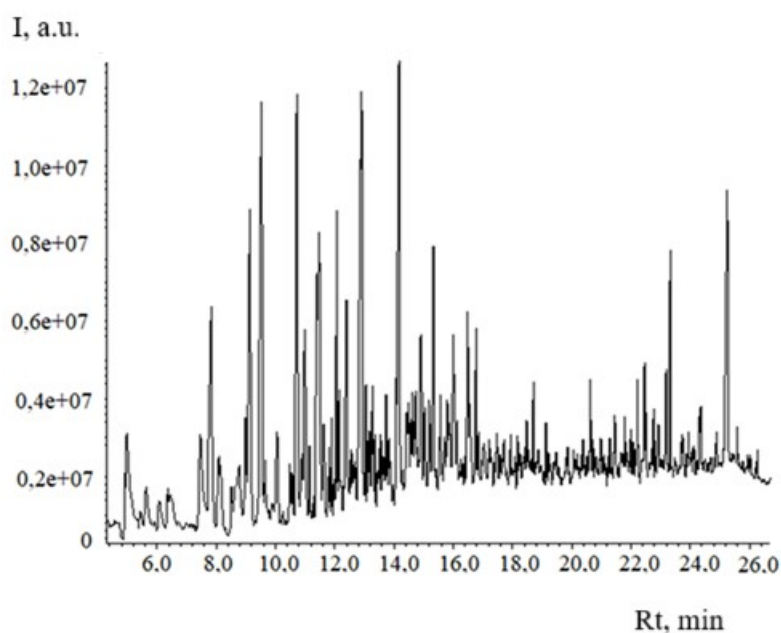

Figure S 2. – GC-MS chromatogram of chloroform solution of pyrolysis oil (pyrolysis oil: chloroform =1:100)

## Urals brand oil analysis

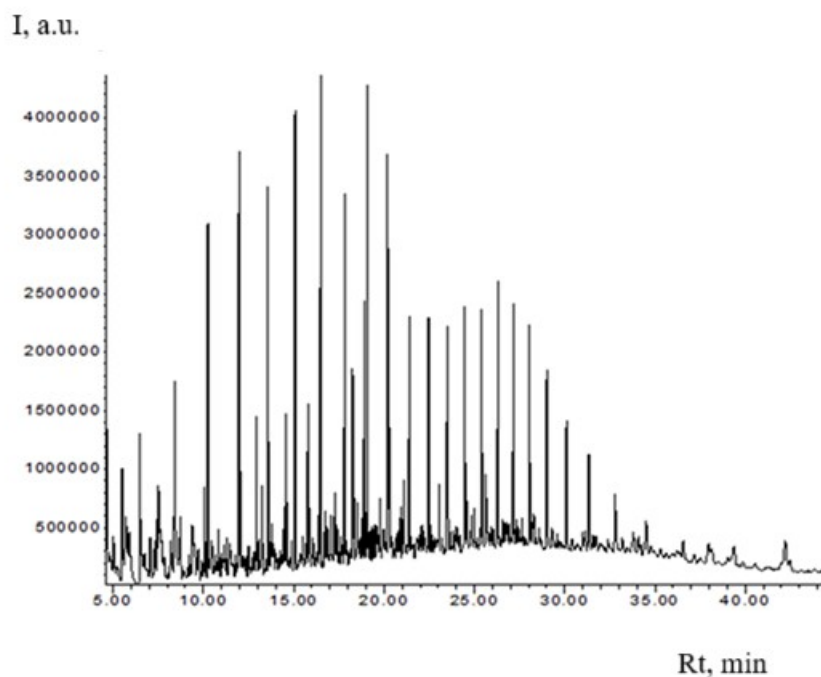

Figure S 3 – GC-MS chromatogram of hexane solution of Urals oil (after deasphalting)

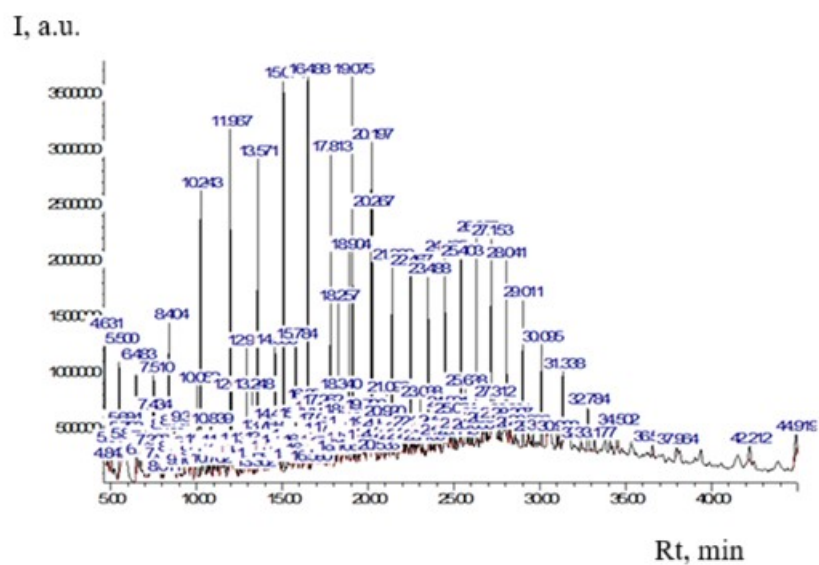

a)

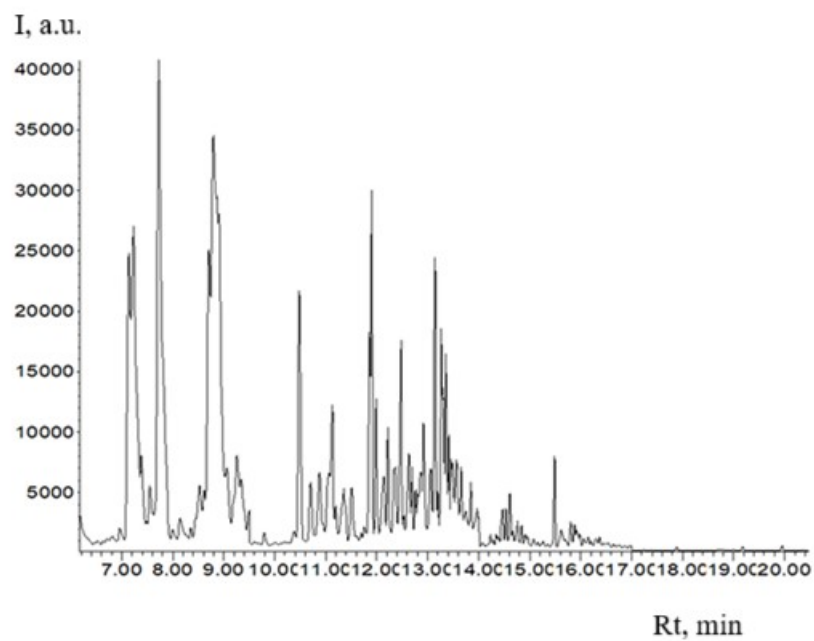

b)

Figure S 4. – GC-MS chromatogram of hexane solution of Urals oil after extraction with DMSO (a); DMSO re-extract hexane solution on SIM mode (b)

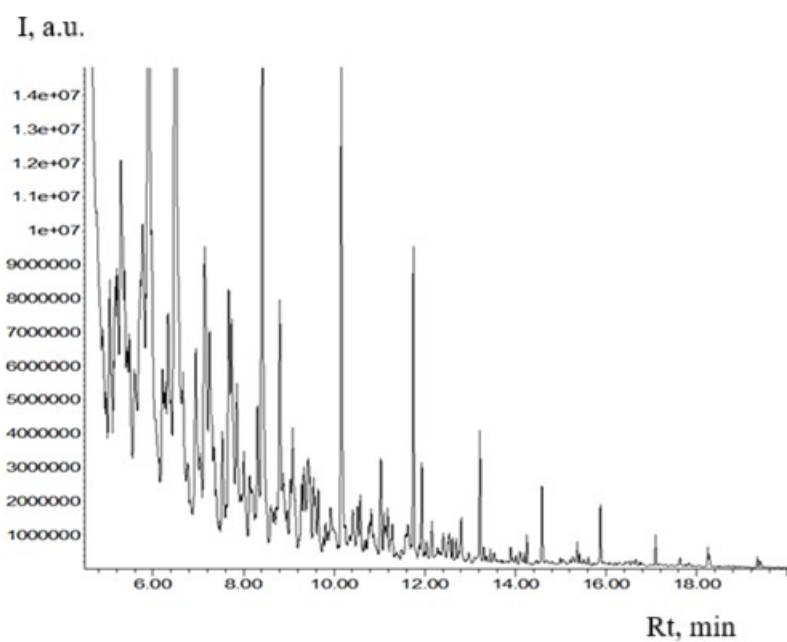

Figure S 5. – GC-MS chromatogram of hexane solution of Urals gasoline fraction

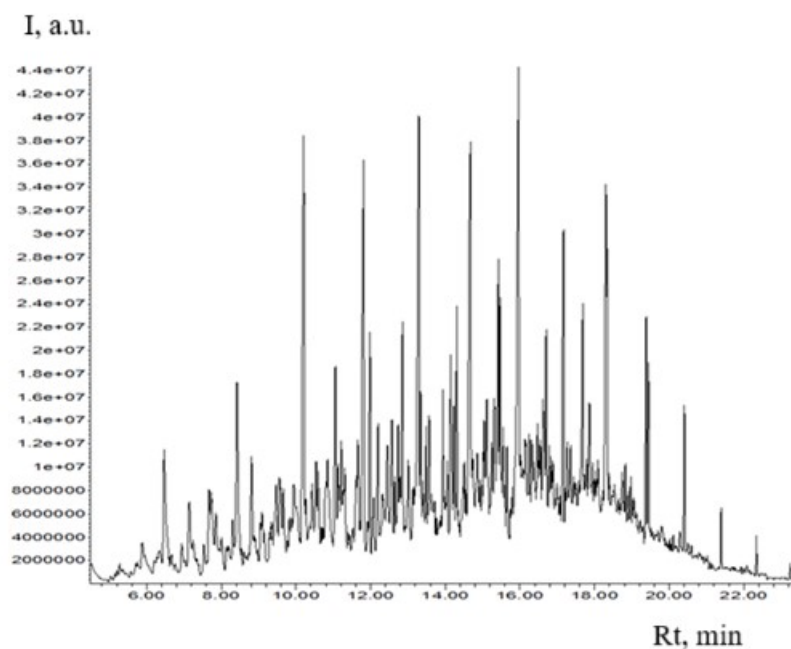

Figure S 6. – GC-MS chromatogram of hexane solution of Urals diesel fraction

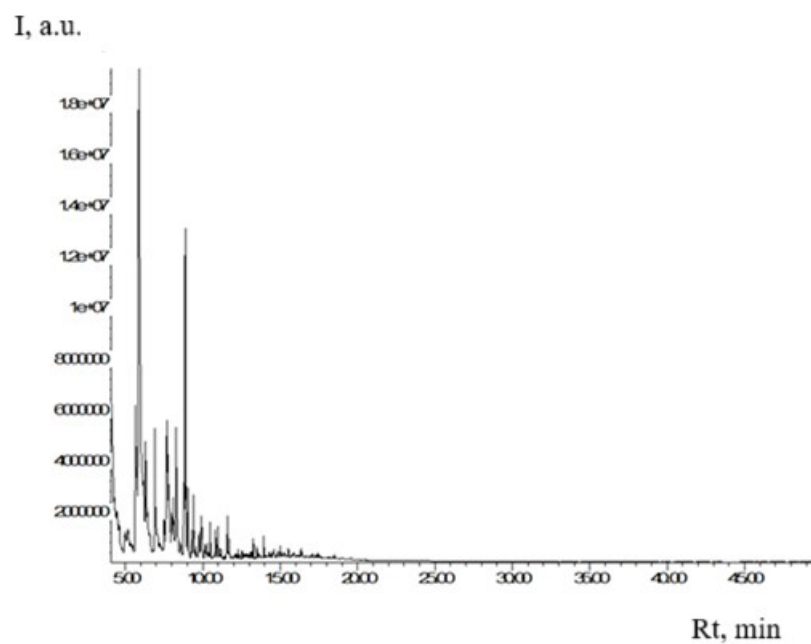

Figure S7. – GC-MS chromatogram of diesel oil after extraction with DMSO (DMSO re-extract hexane solution)

Table S1. – Composition of alkanes and naphthenes in Urals oil and its fractions

| Rt, min | Compound               | Urals oil | Gasoline fraction | Diesel fraction |
|---------|------------------------|-----------|-------------------|-----------------|
| 5,051   | Heptane, 2,6-dimethyl- | +         | +                 | +               |

|        |                                       |   |      |      |
|--------|---------------------------------------|---|------|------|
| 5,209  | Cyclohexane, ethyl-                   | + | +    | +    |
| 5,291  | Cyclohexane, 1,1,3-trimethyl-         | + | +    | +    |
| 5,477  | Cyclooctane, methyl-                  | + | +    | +    |
| 5,772  | Octane, 2-methyl-                     | + | +    | +    |
| 6,212  | Cyclopentane, 1-methyl-2-propyl-      | + | +    | +    |
| 6,494  | Nonane                                | + | +    | +    |
| 7,14   | Nonane, 3-methyl-                     | + | +    | +    |
| 7,34   | Cyclooctane, 1,2-dimethyl-            | + | +    | +    |
| 7,731  | Nonane, 2-methyl-                     | + | +    | +    |
| 7,855  | Nonane, 3-methyl-                     | + | +    | +    |
| 8,412  | Decane                                | + | +    | +    |
| 8,797  | Decane, 4-methyl-                     | + | +    | +    |
| 9,037  | Cyclohexane, (2-methylpropyl)-        | + | +    | +    |
| 9,086  | Cyclodecane, methyl-                  | + | +    | +    |
| 9,285  | 1-Ethyl-2,2,6-trimethylcyclohexane    | + | +    | +    |
| 9,539  | Decane, 2-methyl-                     | + | +    | +    |
| 9,649  | Decane, 3-methyl-                     | + | +    | +    |
| 10,158 | Undecane                              | + | +    | +    |
| 10,412 | Undecane, 5-methyl-                   | + | +    | +    |
| 10,577 | Decane, 3,7-dimethyl-                 | + | +    | +    |
| 10,79  | Cyclohexane, pentyl-                  | + | +    | +    |
| 11,1   | Undecane, 4-methyl-                   | + | +    | +    |
| 11,175 | Undecane, 2-methyl-                   | + | +    | +    |
| 11,746 | Dodecane                              | + | +    | +    |
| 11,931 | Undecane, 3,6-dimethyl-               | + | +    | +    |
| 12,158 | Cyclohexane, 2-butyl-1,1,3-trimethyl- | + | +    | +    |
| 12,612 | Dodecane, 4-methyl-                   | + | +    | +    |
| 12,694 | Dodecane, 2-methyl-                   | + | +    | +    |
| 12,804 | Octane, 2,6-dimethyl-                 | + | +    | +    |
| 12,969 | 3-Tetradecene, (E)-                   | + | +    | +    |
| 13,093 | Cyclotetradecane                      | + | +    | +    |
| 13,217 | Tridecane                             | + | +    | +    |
| 13,444 | Tridecane, 6-methyl-                  | + | +    | +    |
| 14,014 | Tridecane, 4-methyl-                  | + | +    | +    |
| 14,585 | Tetradecane                           | + | +    | +    |
| 15,87  | Pentadecane                           | + | n.d. | +    |
| 17,094 | Hexadecane                            | + | n.d. | +    |
| 18,242 | Heptadecane                           | + | n.d. | +    |
| 19,342 | Octadecane                            | + | n.d. | +    |
| 19,41  | Hexadecane, 2,6,10,14-tetramethyl-    | + | n.d. | +    |
| 20,386 | Hexadecane                            | + | n.d. | +    |
| 21,376 | Heneicosane                           | + | n.d. | +    |
| 22,332 | Hentriacontane                        | + | n.d. | n.d. |
| 24,119 | Tetratetracontane                     | + | n.d. | n.d. |
| 24,951 | Hentriacontane                        | + | n.d. | n.d. |
| 25,762 | Hentriacontane                        | + | n.d. | n.d. |
| 26,539 | Hentriacontane                        | + | n.d. | n.d. |

\*n.d. – not detected

## TPO Gasoline and diesel fractions before hydrotreating

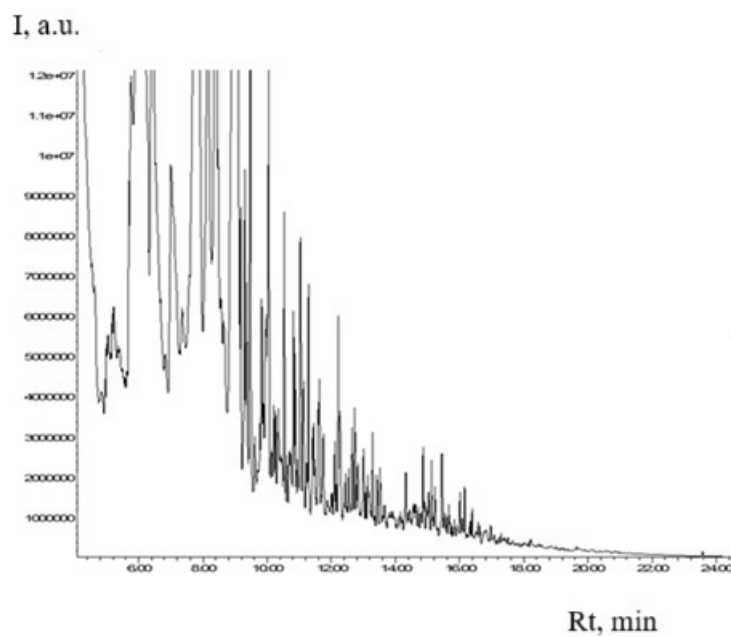

Figure S 8. – GC-MS chromatogram of hexane solution of TPO gasoline fraction

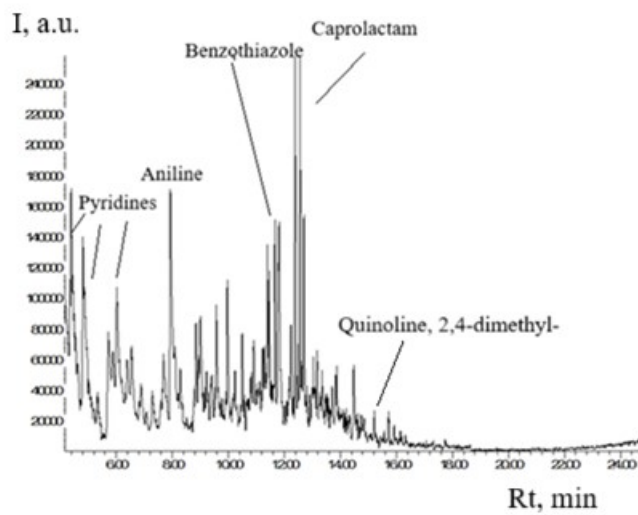

Figure S 9. – GC-MS chromatogram of water-soluble substances extracted from TPO gasoline fraction

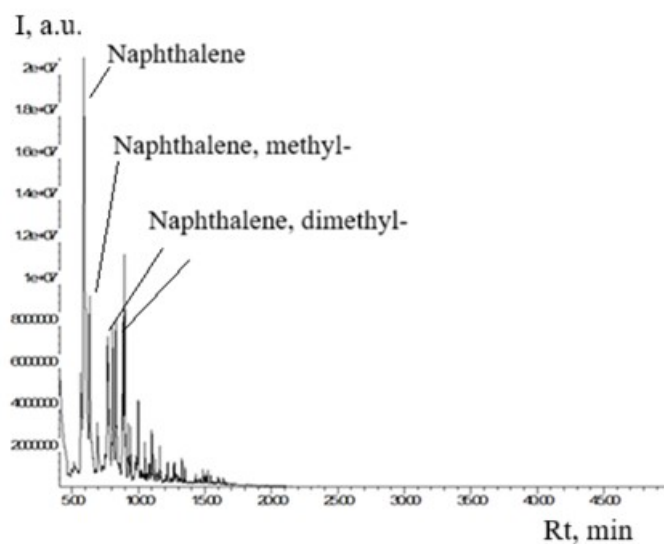

Figure S 10. – GC-MS chromatogram of DMSO re-extract hexane solution of TPO gasoline fraction

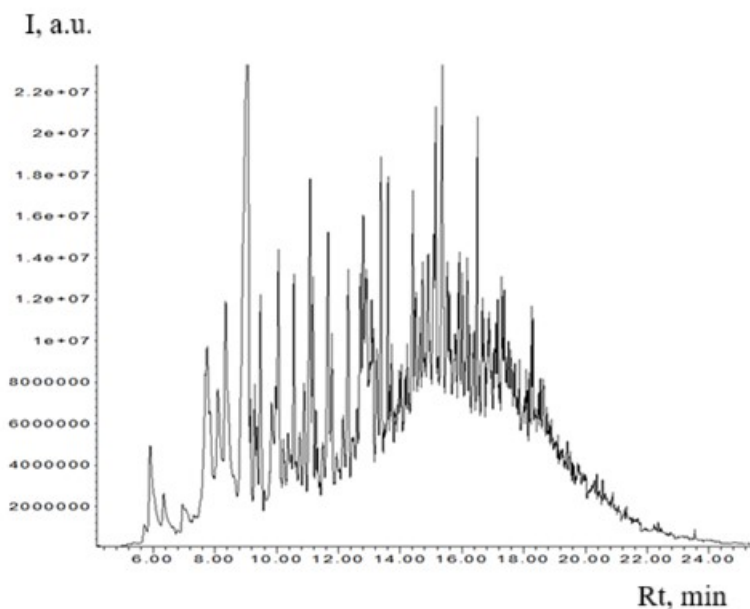

Figure S 11. – GC-MS chromatogram of hexane solution of TPO diesel fraction

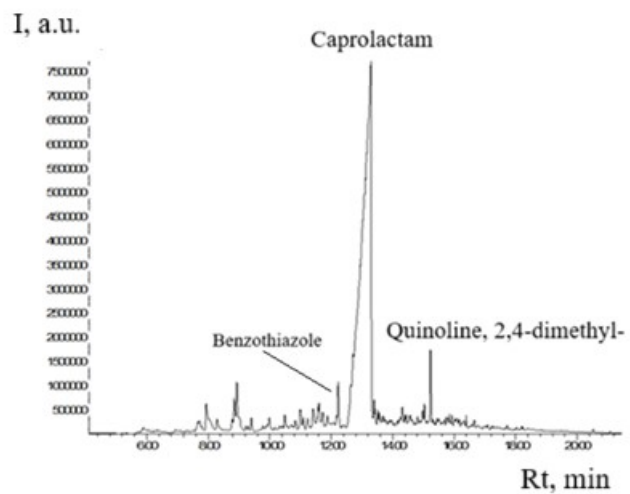

Figure S 12. – GC-MS chromatogram of water-soluble substances extracted from TPO diesel fraction

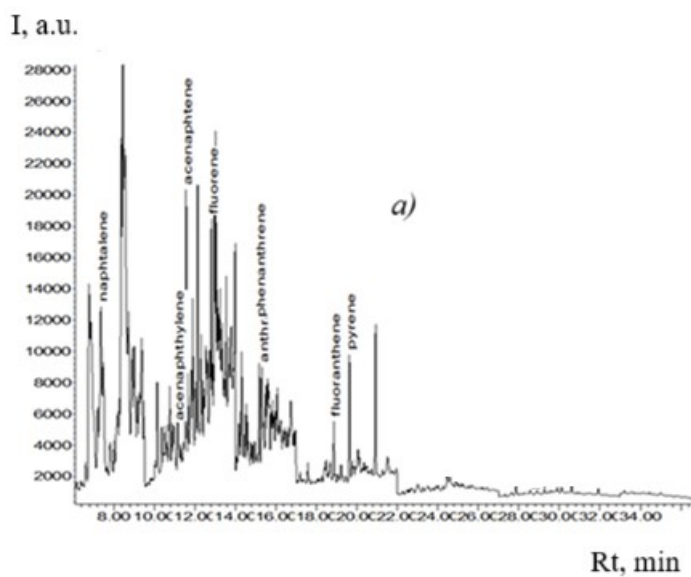



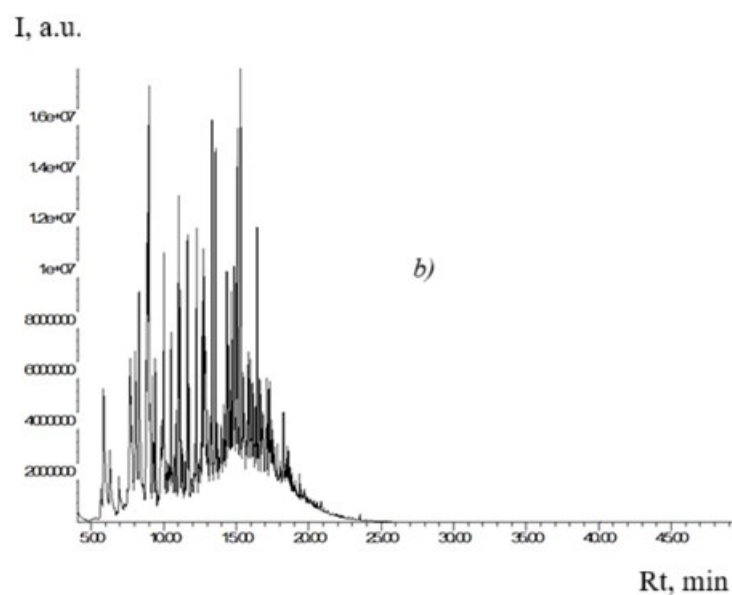

Figure S 13. – GC-MS chromatogram of DMSO re-extract hexane solution of TPO diesel fraction (SIM-*a*; SCAN - *b*)

#### Hydrotreating with Pt catalyst

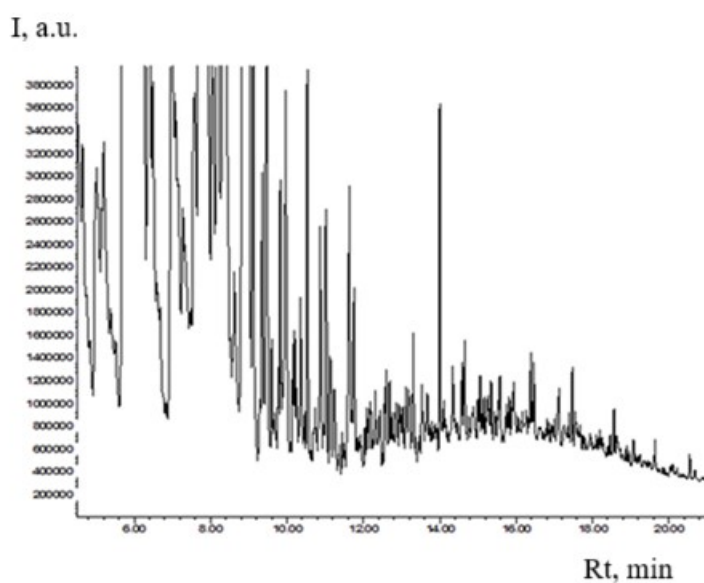

Figure S 14 – GC-MS chromatogram of gasoline fraction of pyrolysis oil after hydrotreating with Pt catalyst

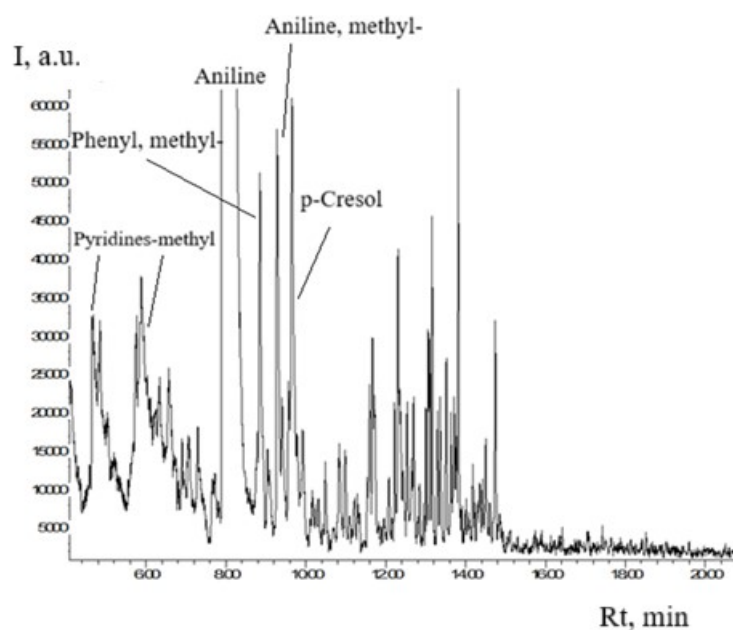

Figure S 15. – GC-MS chromatogram of water-soluble substances extracted from TPO gasoline fraction after hydrotreating with Pt catalyst

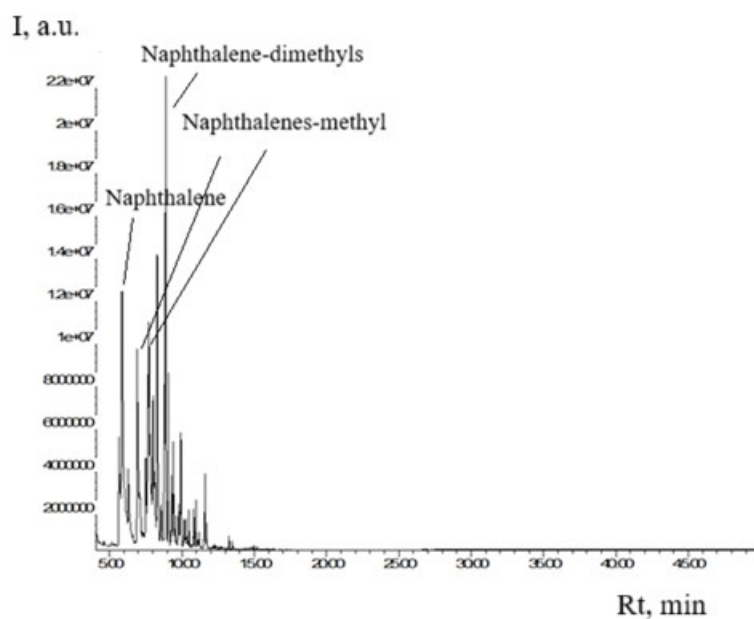

Figure S 15. – GC-MS chromatogram of DMSO re-extract hexane solution of TPO gasoline fraction after hydrotreating with Pt catalyst

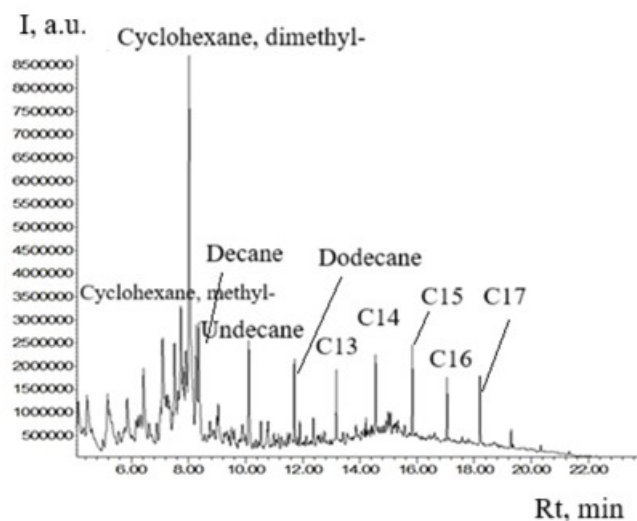

Figure S 16. – GC-MS chromatogram of concentrated hexane solution of TPO gasoline fraction after hydrotreating with Pt catalyst after oleum treatment

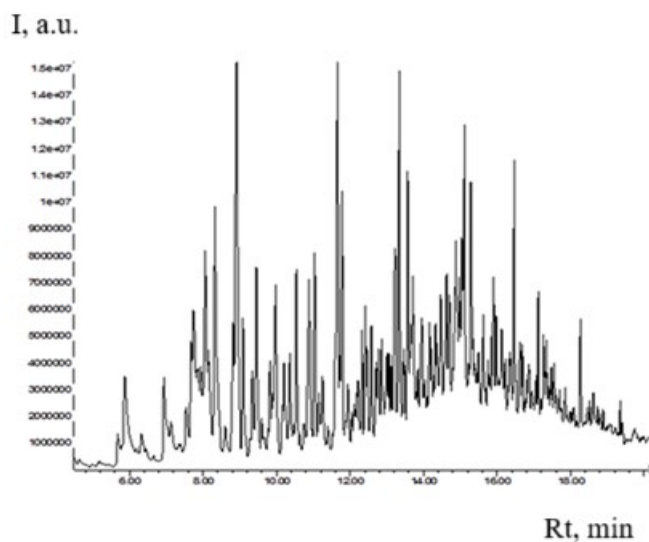

Figure S 17. – GC-MS chromatogram of concentrated hexane solution of TPO diesel fraction after hydrotreating with Pt catalyst

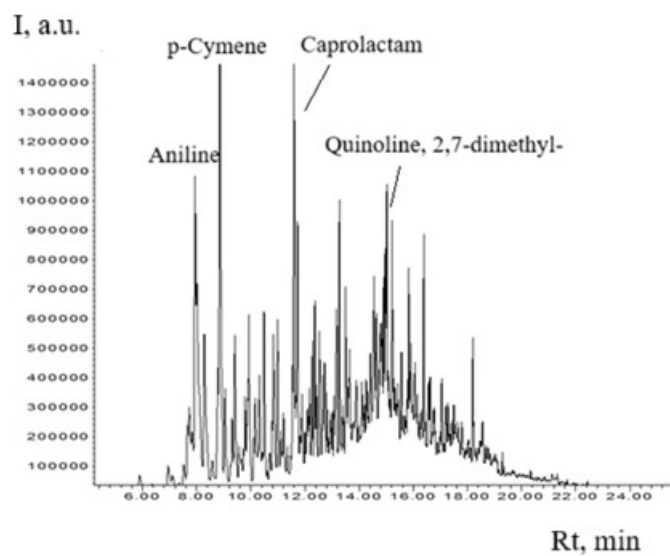

Figure S 18. – GC-MS chromatogram of water-soluble substances extracted from TPO diesel fraction after hydrotreating with Pt catalyst

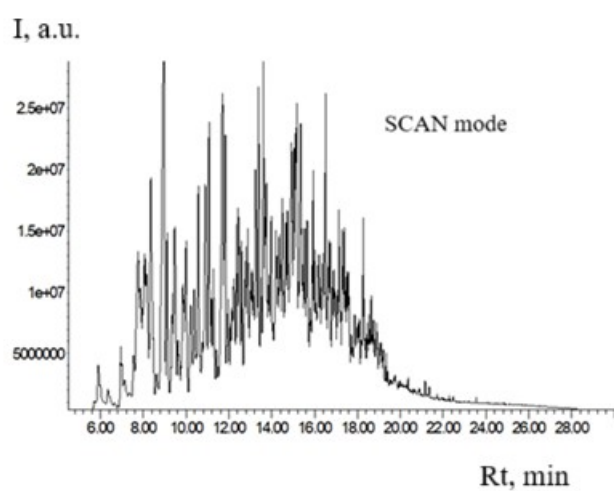

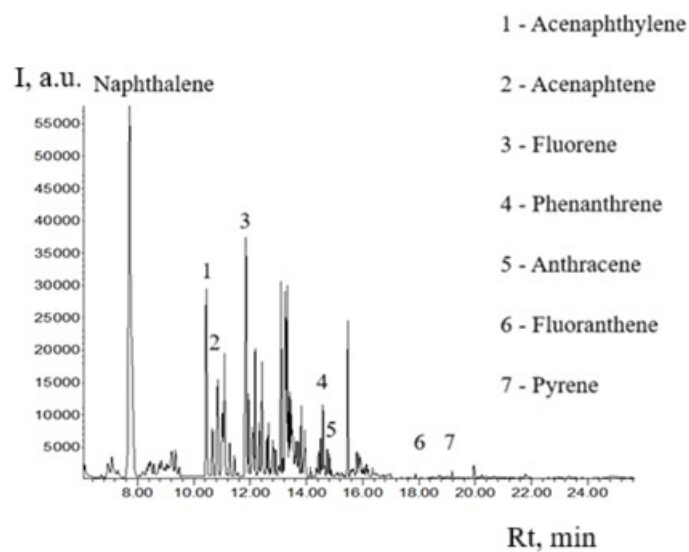

Figure S 19. – GC-MS chromatogram of DMSO re-extract hexane solution of TPO diesel fraction after hydrotreating with Pt catalyst (SCAN and SIM modes)

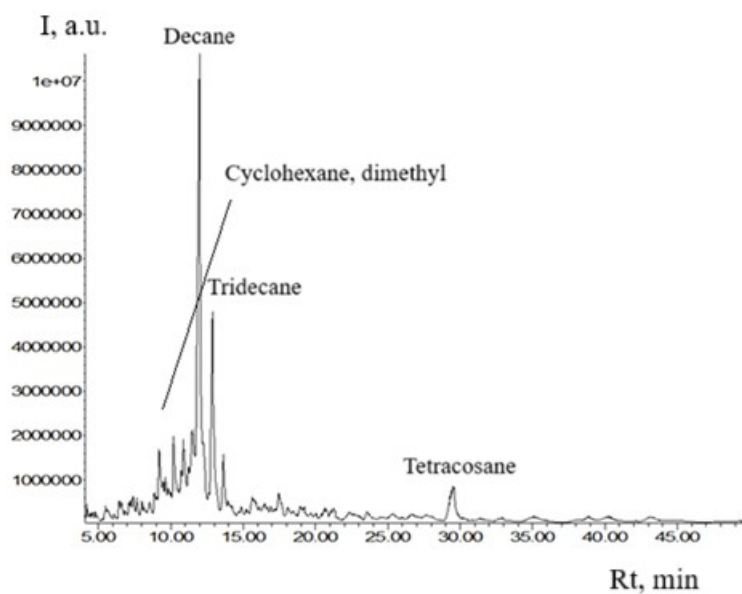

Figure S 20. – GC-MS chromatogram of concentrated hexane solution of TPO diesel fraction after hydrotreating with Pt catalyst after oleum treatment

### Hydrotreating with NiMo catalyst

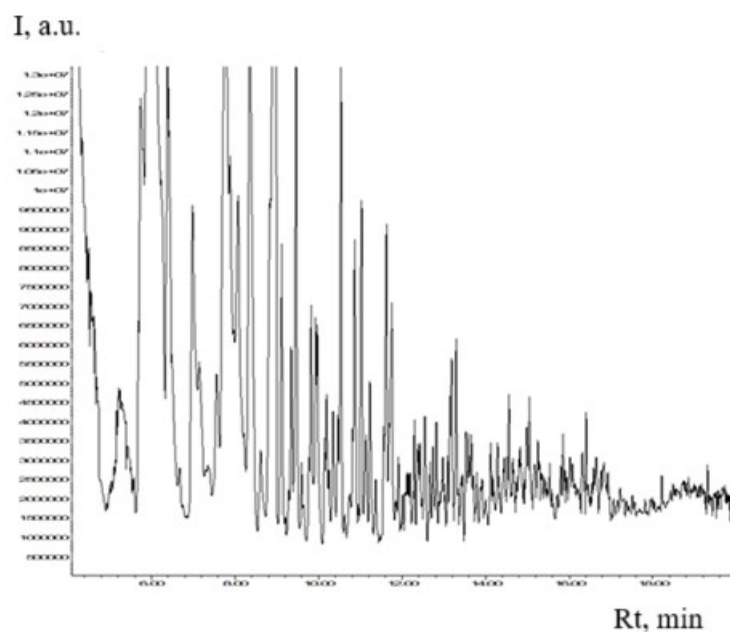

Figure S 21 – GC-MS chromatogram of gasoline fraction of pyrolysis oil after hydrotreating with NiMo catalyst

No water-soluble compounds were found.

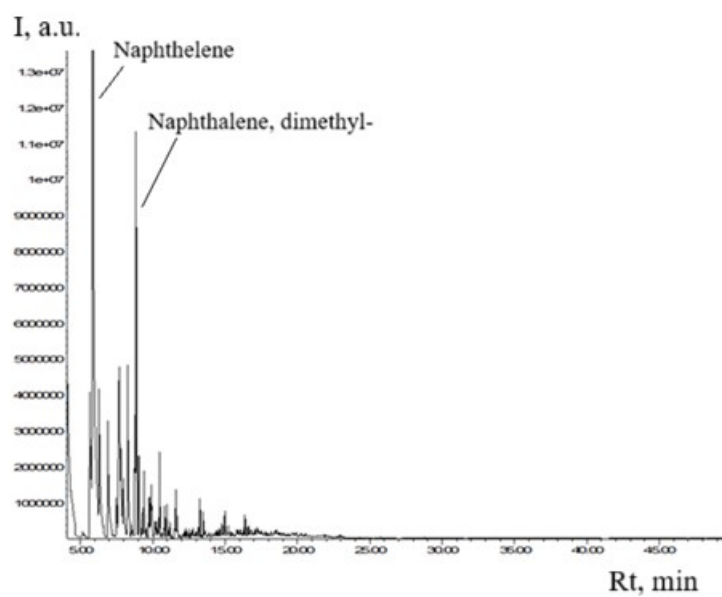

Figure S 22. – GC-MS chromatograms of DMSO re-extract hexane solution of TPO gasoline fraction after hydrotreating with NiMo catalyst (SCAN mode)

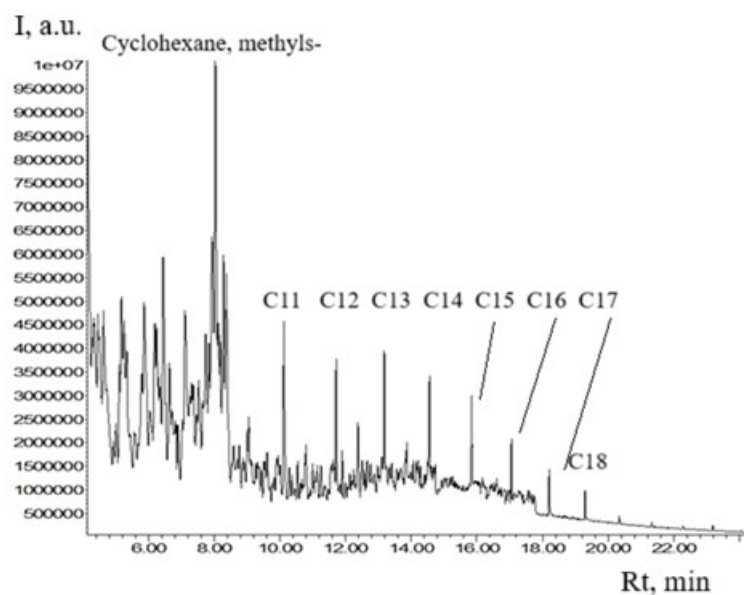

Figure S 23. – GC-MS chromatogram of concentrated hexane solution of TPO gasoline fraction after hydrotreating with NiMo catalyst after oleum treatment

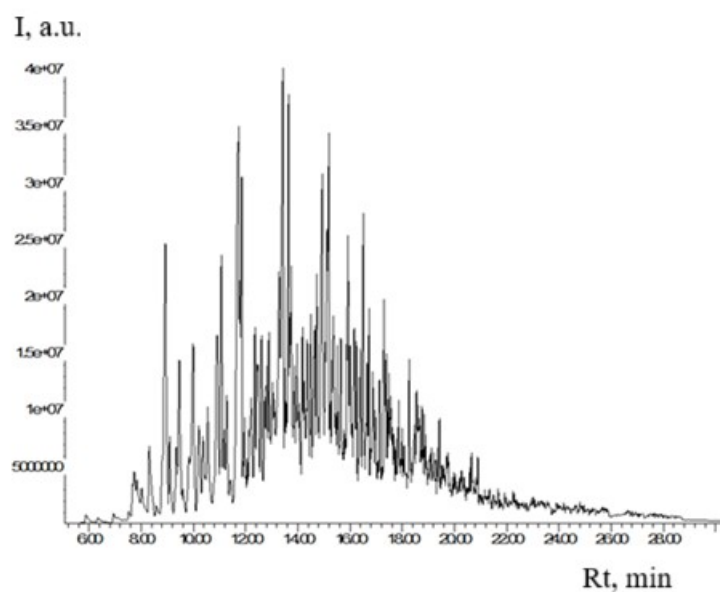

Figure S 24 – GC-MS chromatogram of diesel fraction of pyrolysis oil after hydrotreating with NiMo catalyst

No water-soluble compounds were found.

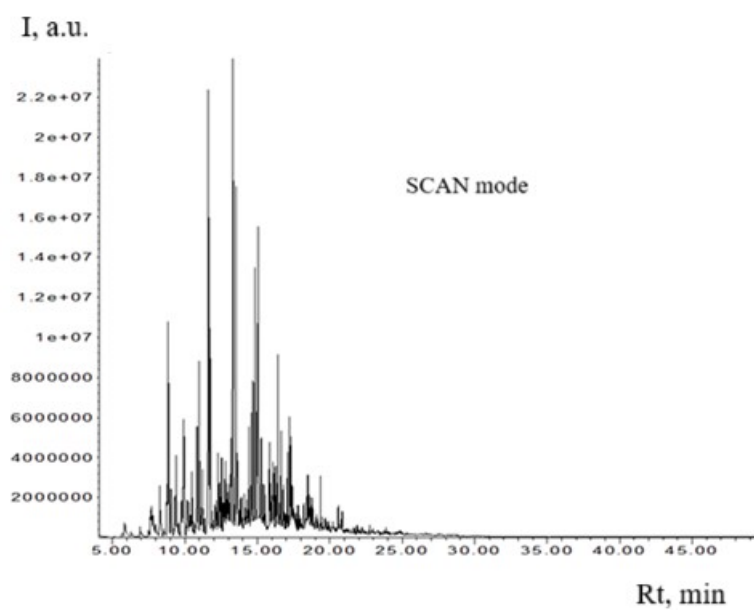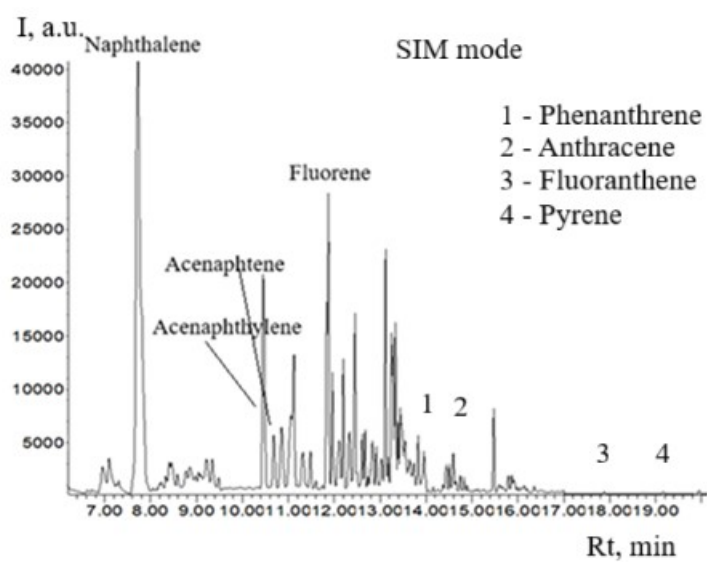

Figure S 25 – GC-MS chromatograms of DMSO re-extract hexane solution of TPO diesel fraction after hydrotreating with NiMo catalyst (SCAN and SIM modes)



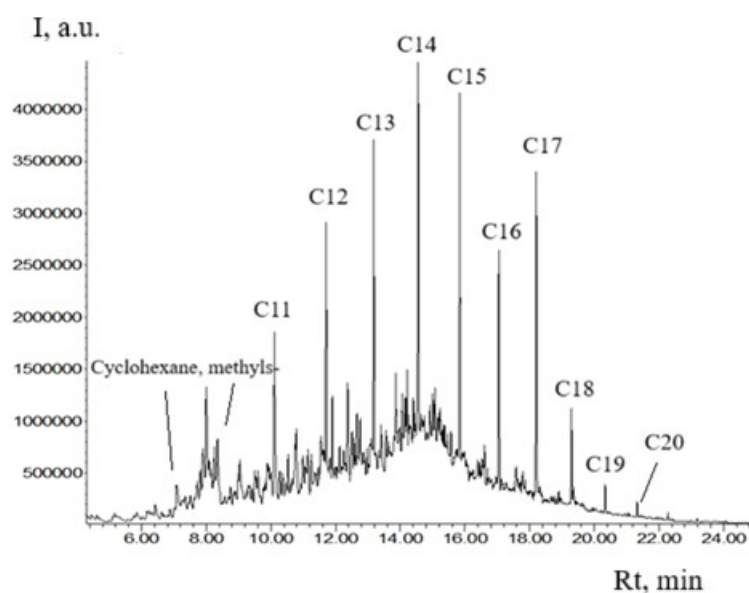

Figure S 26. – GC-MS chromatogram of concentrated hexane solution of TPO diesel fraction after hydrotreating with NiMo catalyst after oleum treatment

Table S2. Comparison of the hydrotreated TPO diesel fraction (NiMo catalyst) with commercial diesel fuel standards

| Property                          | Hydrotreated TPO (NiMo) | EN 590 Limit              | ASTM D975 (D2) Typical Spec | Test Method / Comment                                   |
|-----------------------------------|-------------------------|---------------------------|-----------------------------|---------------------------------------------------------|
| Density at 15°C (kg/m³)           | 889.3 ± 0.5             | 820-845                   | 850 max (approx.)           | Exceeds limit. High density indicates high aromaticity. |
| Sulfur Content (wt%)              | 0.0432 ± 0.0021         | ≤ 0.0010 (S10)            | ≤ 0.0015                    | Exceeds limit by >40x. Major barrier for direct use.    |
| Polycyclic Aromatics (PAHs) (wt%) | 0.200 ± 0.007           | ≤ 8 (v/v%) / ≤ 11 (v/v%)* | Not specified               | Meets EN 590 PAH limit in wt%*.                         |
| Flash Point                       | 60.0 ± 1.7              | ≥ 55                      | ≥ 52                        | Meets/Exceeds                                           |

| Property                                      | Hydrotreated<br>TPO (NiMo) | EN 590<br>Limit                             | ASTM<br>D975 (D2)<br>Typical<br>Spec | Test Method / Comment      |
|-----------------------------------------------|----------------------------|---------------------------------------------|--------------------------------------|----------------------------|
| (°C)                                          |                            |                                             |                                      | requirement.               |
| Heating<br>Value<br>(MJ/kg)                   | 43.4 ± 1.2                 | ~45.5<br>(min.<br>cetane<br>index<br>proxy) | ~42.7<br>(min)                       | Satisfactory/Comparable.   |
| Iodine<br>Number (g<br>I <sub>2</sub> /100 g) | 5.3 ± 0.3                  | Not<br>specified                            | Not<br>specified                     | Indicates high saturation. |
| Acid<br>Number (mg<br>KOH/g)                  | <0.06                      | Not<br>specified                            | ≤ 0.1<br>(D975)                      | Meets cleanliness spec.    |

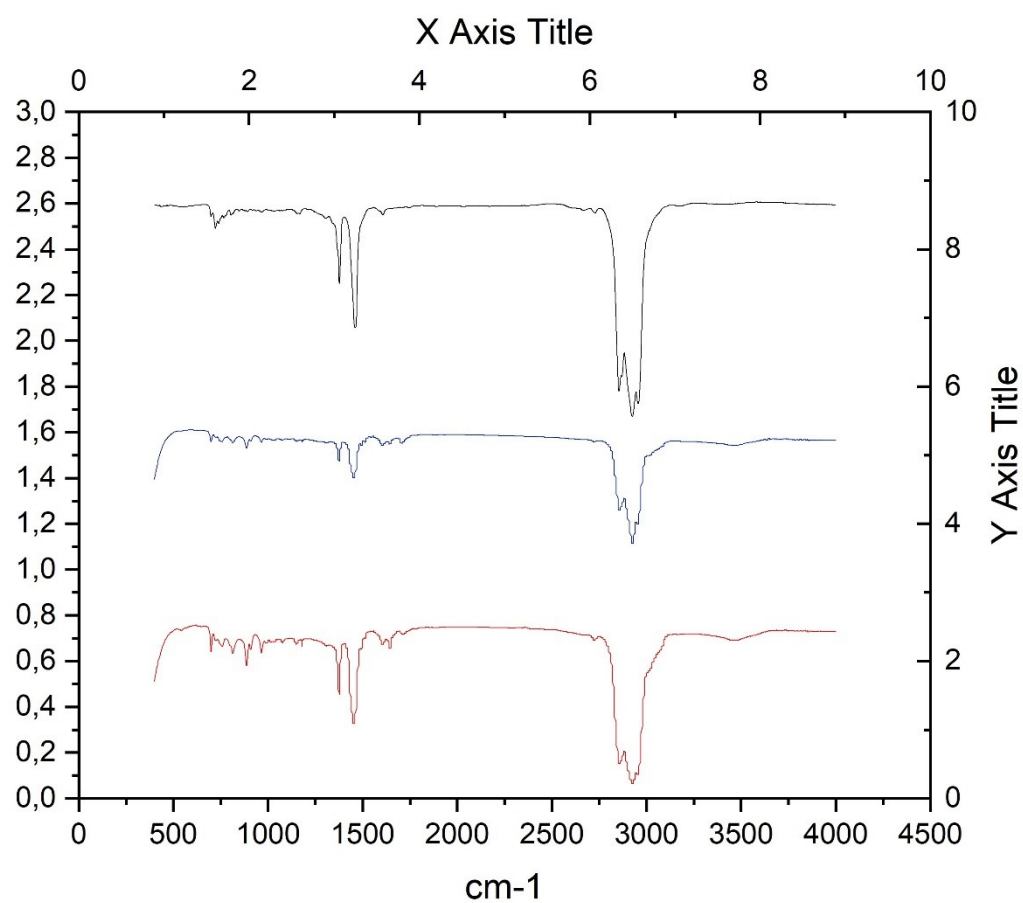

Fig. S 27. FTIR spectra of raw tire pyrolysis oil (TPO), of the hydrotreated diesel fraction (Pt- and NiMo/Al<sub>2</sub>O<sub>3</sub> catalyst).
